# Supplementary material for: Basal Blood Morphology, Serum Biochemistry, and the Liver and Muscle Structure of Weaned Wistar Rats Prenatally Exposed to Fumonisins
Source: MDPI journal article supplement (doi:10.3390/ani12182353), 2022-09-08
Supplement: s1 [file s1]

# Basal blood morphology, serum biochemistry, and the liver and muscle structure of weaned Wistar rats, prenatally exposed to fumonisins

Ewa Tomaszewska, Halyna Rudyk , Dorota Wojtysiak, Janine Donaldson, Siemowit Muszyński, Marcin B. Arciszewski, Nataliia Lisova, Oksana Brezvyin, Iwona Puzio, Beata Abramowicz, Marta Pawłowska-Olszewska, Ihor Kotsyumbas and Piotr Dobrowolski

The list protein abbreviations in STRING protein-protein interaction diagram in Figures 6,7 and supplementary Figures S1 and S2. with description from UniProt database via STRING of their basic functions.

|                 |                                                                                                                                                                                                                                                                                                                                                                                                         |
|-----------------|---------------------------------------------------------------------------------------------------------------------------------------------------------------------------------------------------------------------------------------------------------------------------------------------------------------------------------------------------------------------------------------------------------|
| Cers1,2,3,4,5,6 | Ceramide synthase 1,2,3,4,5,6; Inhibited by fumonisin B1, especially Cers5;                                                                                                                                                                                                                                                                                                                             |
| Csf1            | Macrophage colony-stimulating factor 1; This cytokine plays an crucial role in the regulation of proliferation, survival and differentiation of hematopoietic precursor cells (monocytes and macrophages);                                                                                                                                                                                              |
| Csf1r           | The receptor of macrophage colony-stimulating factor 1;                                                                                                                                                                                                                                                                                                                                                 |
| Degs2           | Sphingolipid delta(4)-desaturase/C4-monooxygenase DES2; Bifunctional enzyme which acts as both a sphingolipid delta(4)-desaturase and a sphingolipid C4-monooxygenase;                                                                                                                                                                                                                                  |
| Epo             | Erythropoietin; This hormone regulates erythrocyte differentiation and proliferation;                                                                                                                                                                                                                                                                                                                   |
| Epor            | Receptor for erythropoietin. Mediates erythropoietin-induced erythroblast proliferation and differentiation;                                                                                                                                                                                                                                                                                            |
| Ghr             | The receptor of growth hormone receptor; It is important for the regulation of postnatal development;                                                                                                                                                                                                                                                                                                   |
| Ghrl            | Appetite-regulating hormone; It stimulates the secretion of gastric acid, and is involved in growth regulation;                                                                                                                                                                                                                                                                                         |
| Hgf             | Hepatocyte growth factor; hepatotrophic factor;                                                                                                                                                                                                                                                                                                                                                         |
| Igf1            | Insulin-like growth factor I;                                                                                                                                                                                                                                                                                                                                                                           |
| Igf1r           | The receptor of insulin-like growth factor 1 receptor;                                                                                                                                                                                                                                                                                                                                                  |
| Igf2            | Insulin-like growth factor II; The main growth hormone during prenatal time in mammals. It regulates tissue differentiation and feto-placental development;                                                                                                                                                                                                                                             |
| Il6             | Interleukin-6;                                                                                                                                                                                                                                                                                                                                                                                          |
| Il6r            | Interleukin receptor;                                                                                                                                                                                                                                                                                                                                                                                   |
| Ins1            | Insulin-1;                                                                                                                                                                                                                                                                                                                                                                                              |
| Jak2            | Tyrosine-protein kinase JAK2; In the cytoplasm, It plays a essential role in signal transmission through its link with receptors like prolactin (PRLR), growth hormone (GHR), erythropoietin (EPOR), leptin (LEPR), thrombopoietin (THPO);                                                                                                                                                              |
| Lep             | Leptin; It regulates energy homeostasis and controls body weight;                                                                                                                                                                                                                                                                                                                                       |
| Lepr            | Receptor for hormone leptin;                                                                                                                                                                                                                                                                                                                                                                            |
| Map3K11         | Mitogen-activated protein kinase 11; It participates in the JUN N-terminal pathway.                                                                                                                                                                                                                                                                                                                     |
| Mapk12          | Serine/threonine kinase, an essential component of the MAP kinase signal transduction pathway;                                                                                                                                                                                                                                                                                                          |
| Met             | Receptor tyrosine kinase which transduces signal from the extracellular matrix into the cell (the cytoplasm) by connection to hepatocyte growth factor/HGF ligand;                                                                                                                                                                                                                                      |
| Sgms1,2         | Sphingomyelin synthase 1 and 2; They synthesize the sphingolipid (sphingomyelin);                                                                                                                                                                                                                                                                                                                       |
| Smpd1,2         | Sphingomyelin phosphodiesterase 1,2; Converts sphingomyelin to ceramide;                                                                                                                                                                                                                                                                                                                                |
| Socs1,3         | SOCs family proteins. Socs1 and 3 are involved in the negative regulation through the JAK/STAT3 pathway. Socs3 can inhibit cytokine signal transduction through binding to the receptors of tyrosine kinase including insulin, erythropoietin , IL12, and leptin receptors. Through the connection to JAK2, it inhibits its kinase activity, and lead to the suppression of fetal liver erythropoiesis; |
| Stat3           | Signal activator and transducer of transcription 3 that participate in the mediation of cellular responses to leptin, IIs, and other growth factors.                                                                                                                                                                                                                                                    |

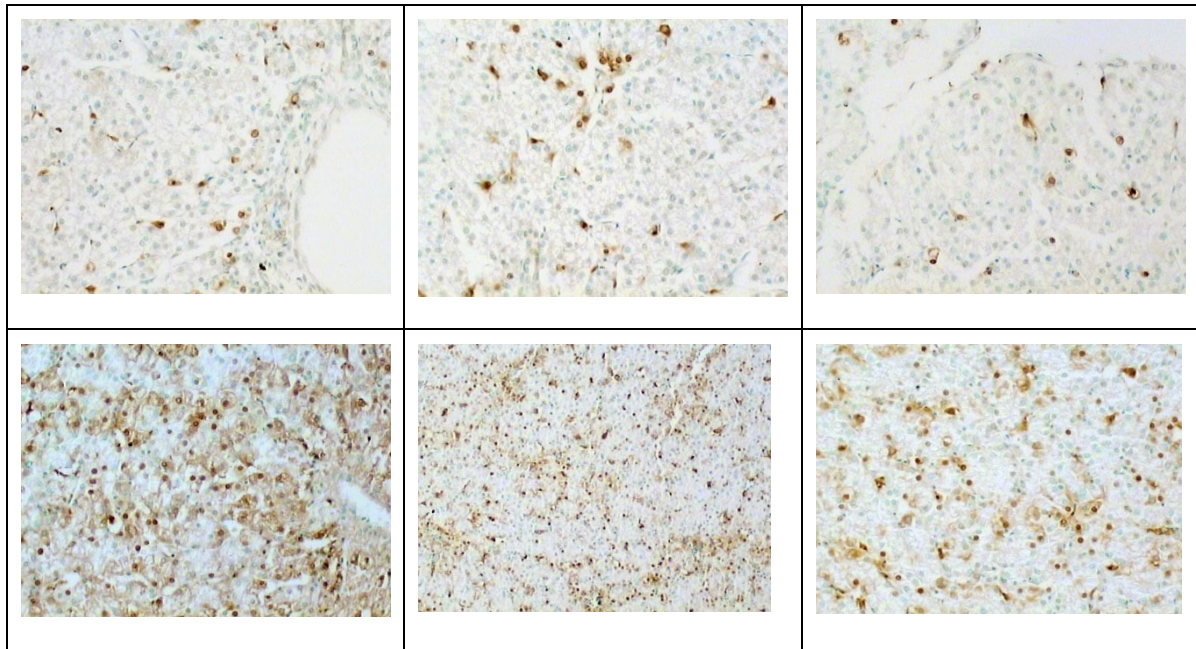

**Figure S1.** Additional photos of the effect of maternal FB intoxication on liver apoptosis (detected by the TUNEL reaction). Magnification x200.

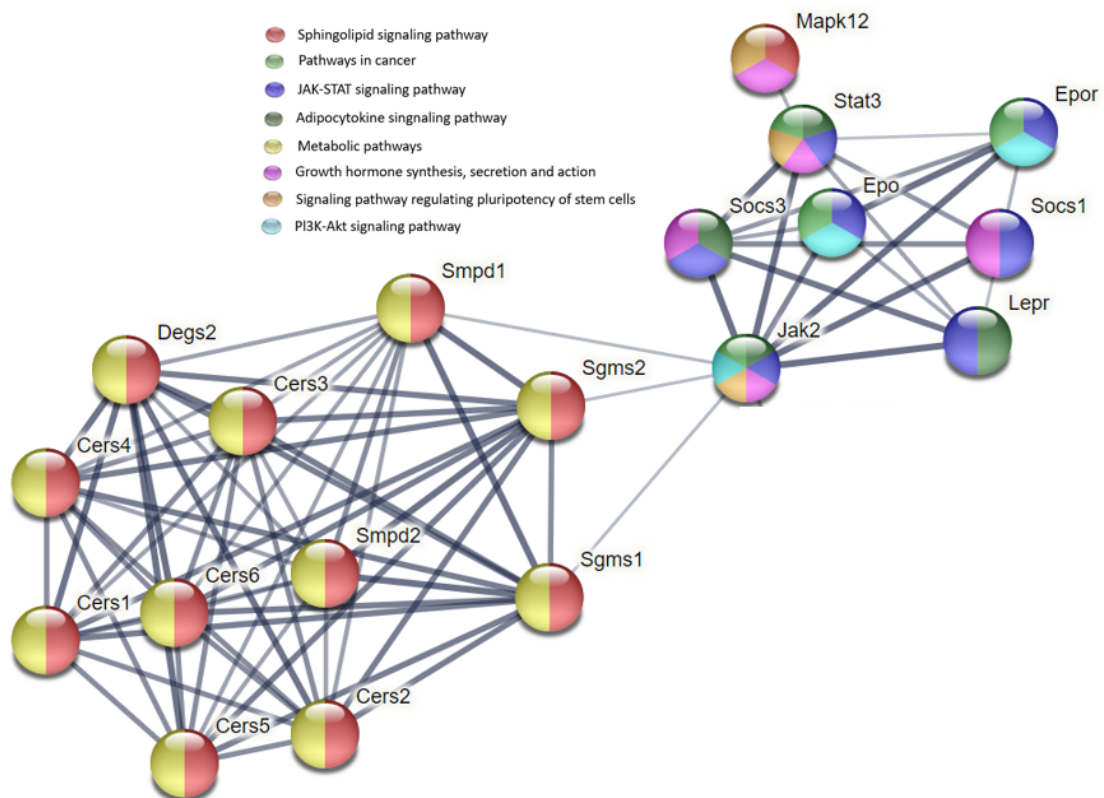

**Figure S2.** STRING protein-protein interaction diagram in various signaling pathways involving lipid biosynthesis-related proteins inhibited by FB (ceramide synthase and serine/threonine phosphatase). The thickest edge indicates the highest confidence in protein-protein association. Gene ontology pathway analysis revealed that the proteins presented here are involved in many biological pathways. Network contains 19 nodes; <https://string-db.org/>, accessed on 24.07.2022.
